# Supplementary material for: Structural and Chemical Profiling of the Human Cytosolic Sulfotransferases
Source: PLOS journal article supplement (doi:10.1371/journal.pbio.0050097), 2007-04-04
Supplement: S2 (10.1371/journal.pbio.0050097.s002) [file journal.pbio.0050097.s002]

**Supporting Table 2**. **List of 90 compounds in SULT compound library.**

| **Compound** |
| --- |
| mefenamic acid |
| salbutamol |
| R-(-)-apomorphine hydrochloride hemihydrate |
| salicylic acid |
| quercetin dihydrate |
| resveratrol |
| acetaminophen (paracetamol) |
| isoprenaline hydrochloride |
| vanillin |
| tyramine |
| *p*-cresol |
| 4-aminophenol |
| (±)-epinephrine |
| pentachlorophenol |
| 2,6-dinitrotoluene |
| 2,4-dinitrotoluene |
| -zearalenol |
| 2-hydroxyestradiol |
| 4-ethylphenol |
| lithocholic acid |
| (±)-chlorpheniramine maleate salt |
| 4-nitrophenol |
| clomiphene citrate salt |
| adenosine-3',5'-bisphosphate |
| N-(iodoacetyl-aminoethyl)-5-N'-naphthylamin-1-sulfonic acid (1,5-IAEDANS) |
| N-bromosuccinimide |
| *p*-chloromercuribenzoate |
| 2,6-dichloro-4-nitrophenol |
| 3-hydroxyindole (1H-indol-3-ol dihydrogen phosphate ester, disodium salt) |
| dopamine (hydrochloride) |
| minoxidil |
| (+)-(S)-1,2,3,4-tetrahydro-1-naphthol |
| 1-naphthol |
| 2,3-butanedione |
| 2-ethylphenol |
| 2-*n*-propylphenol |
| 2-*sec*-butylphenol |
| 4-*n*-amylphenol (4-pentylphenol) |
| 4-*n*-heptylphenol |
| 3,5-dibromo-4-hydroxy-benzoic acid (6,8-dichloro-4-oxo-4H-chromen-3-ylmethylene)-hydrazide |
| 3,5-dibromo-4-hydroxy-benzoic acid (6-chloro-4-oxo-4H-chromen-3-ylmethylene)-hydrazide |
| N-acetylglucosamine 6-sulfate sodium salt, mixed anomers |
| sucrose |
| D-(+) glucose |
| 2-aminofluorene |
| 17-ethynylestradiol |
| dexamethasone |
| estrone |
| thienylbutyl isothiocyanate |
| thienyldecyl isothiocyanate |
| thienyldodecyl isothiocyanate |
| -aminobutyric acid - GABA |
| acetylcholine chloride |
| (-)-norepinephrine |
| histamine dihydrochloride |
| cytidine 5'-diphosphocholine |
| pyridoxal 5’-phosphate |
| thiamine monophosphate |
| niacin - vitamin B3 |
| argininosuccinic acid disodium salt |
| DL-glyceraldehyde |
| L-ornithine monohydrochloride |
| L-citrulline |
| coenzyme B12 |
| ADP - Na |
| CDP - Na |
| GDP - Na |
| UDP - Na |
| ATP - diNa |
| CTP - Na |
| GTP - Na |
| ITP - triNa |
| UTP - Na |
| AMP-PNP (adenosine 5′-(β,γ-imido)triphosphate) |
| GMP-PNP (5'-guanosyl-imido-triphosphate) |
| guanosine |
| T2 (3,5-diiodo-L-thyronine) |
| T3 (3,3′,5-triiodo-L-thyronine sodium salt) |
| T4 (3,3′,5,5'-tetraiodo-L-thyronine) (L-thyroxine) |
| dehydroisoandrosterone 3-sulfate sodium salt |
| 2-naphthol |
| dATP |
| dGTP |
| dCTP |
| dTTP |
| Rp-cAMPS triethylammonium salt (Rp-Adenosine 3′,5′-cyclic monophosphorothioate triethylammonium salt hydrate) |
| D-(+)-glucosamine hydrochloride |
| D-glucosamine 6-sulfate |
| H-7 (1-(5-isoquinolinesulfonyl)-2-methylpiperazine) |
| H-7 dihydrochloride (1-(5-isoquinolinesulfonyl)-2-methylpiperazine dihydrochloride) |
| control 100 mM HEPES 150 mM NaCl pH 7.5 1% DMSO |
| control 100 mM HEPES 150 mM NaCl pH 7.5 |
